# Supplementary material for: Crizotinib in patients with tumors harboring ALK or ROS1 rearrangements in the NCI-MATCH trial
Source: PubMed Central journal article supplement (PMC8888601; doi:10.1038/s41698-022-00256-w), 2022-03-01
Supplement: 41698_2022_256_MOESM1_ESM.pdf [file 41698_2022_256_MOESM1_ESM.pdf]

**Supplemental Figure 1: Sub-protocol F (ALK) CONSORT diagram**

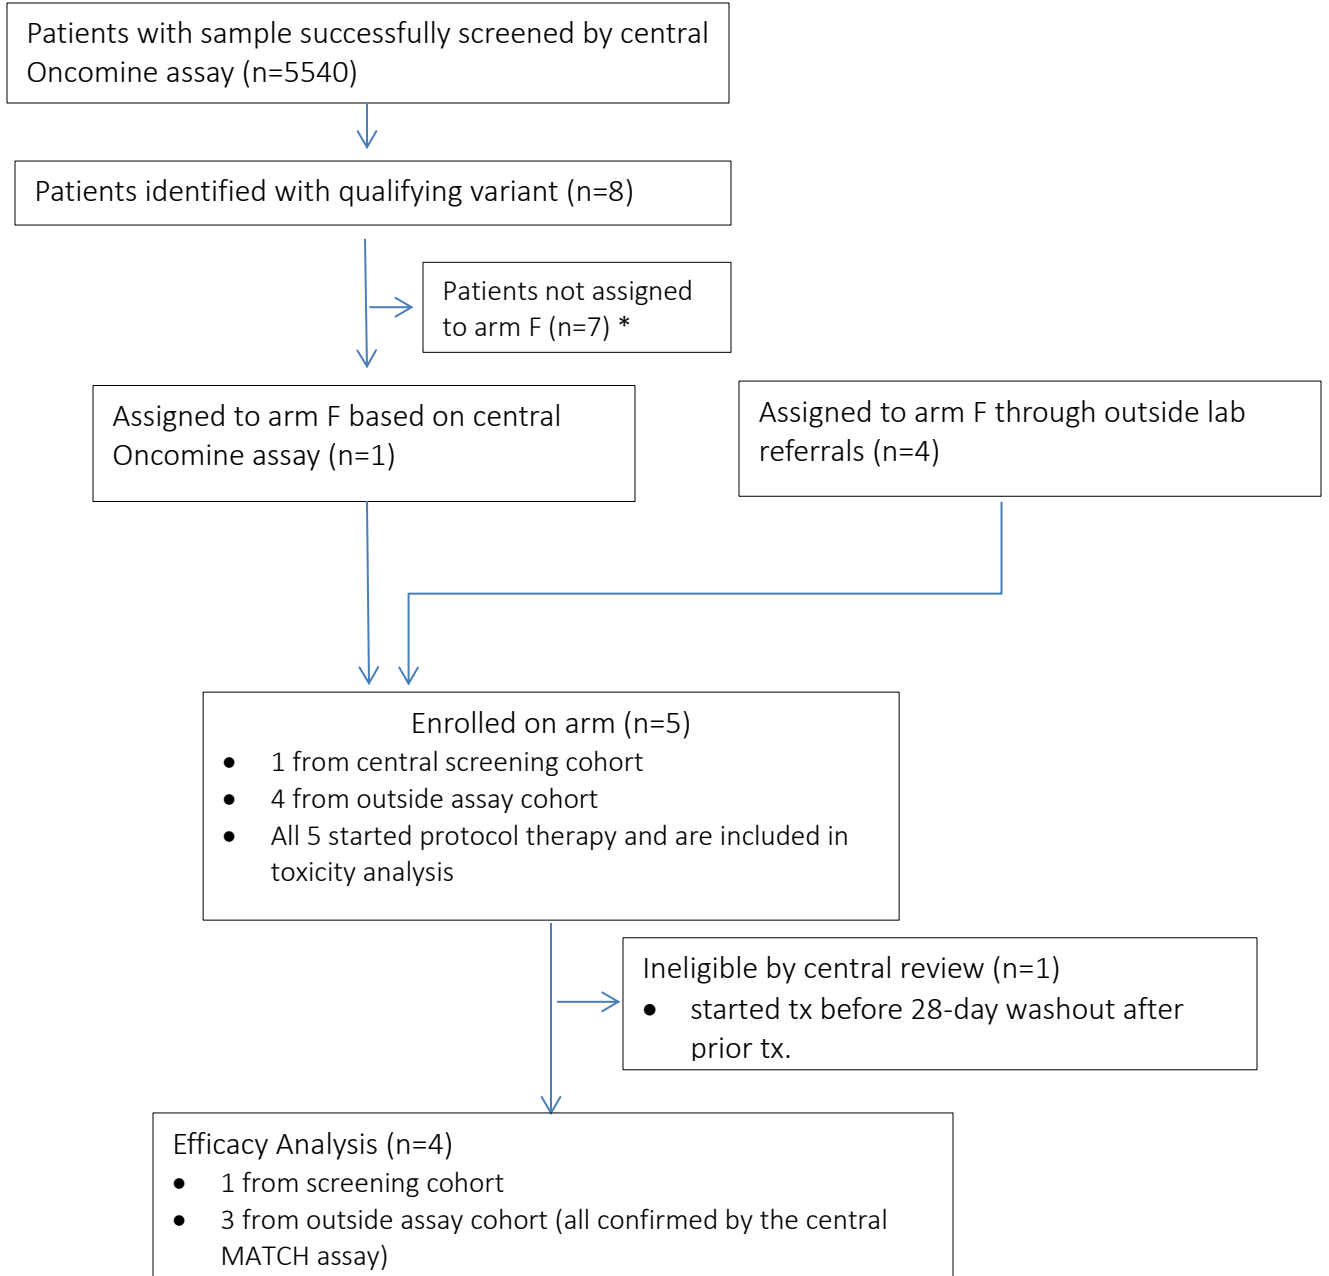

\*Reasons not receiving an assignment (all due to ineligible histology): Lung adenocarcinoma (n=7)

**Supplemental Figure 2: Sub-protocol G (ROS1) CONSORT diagram**

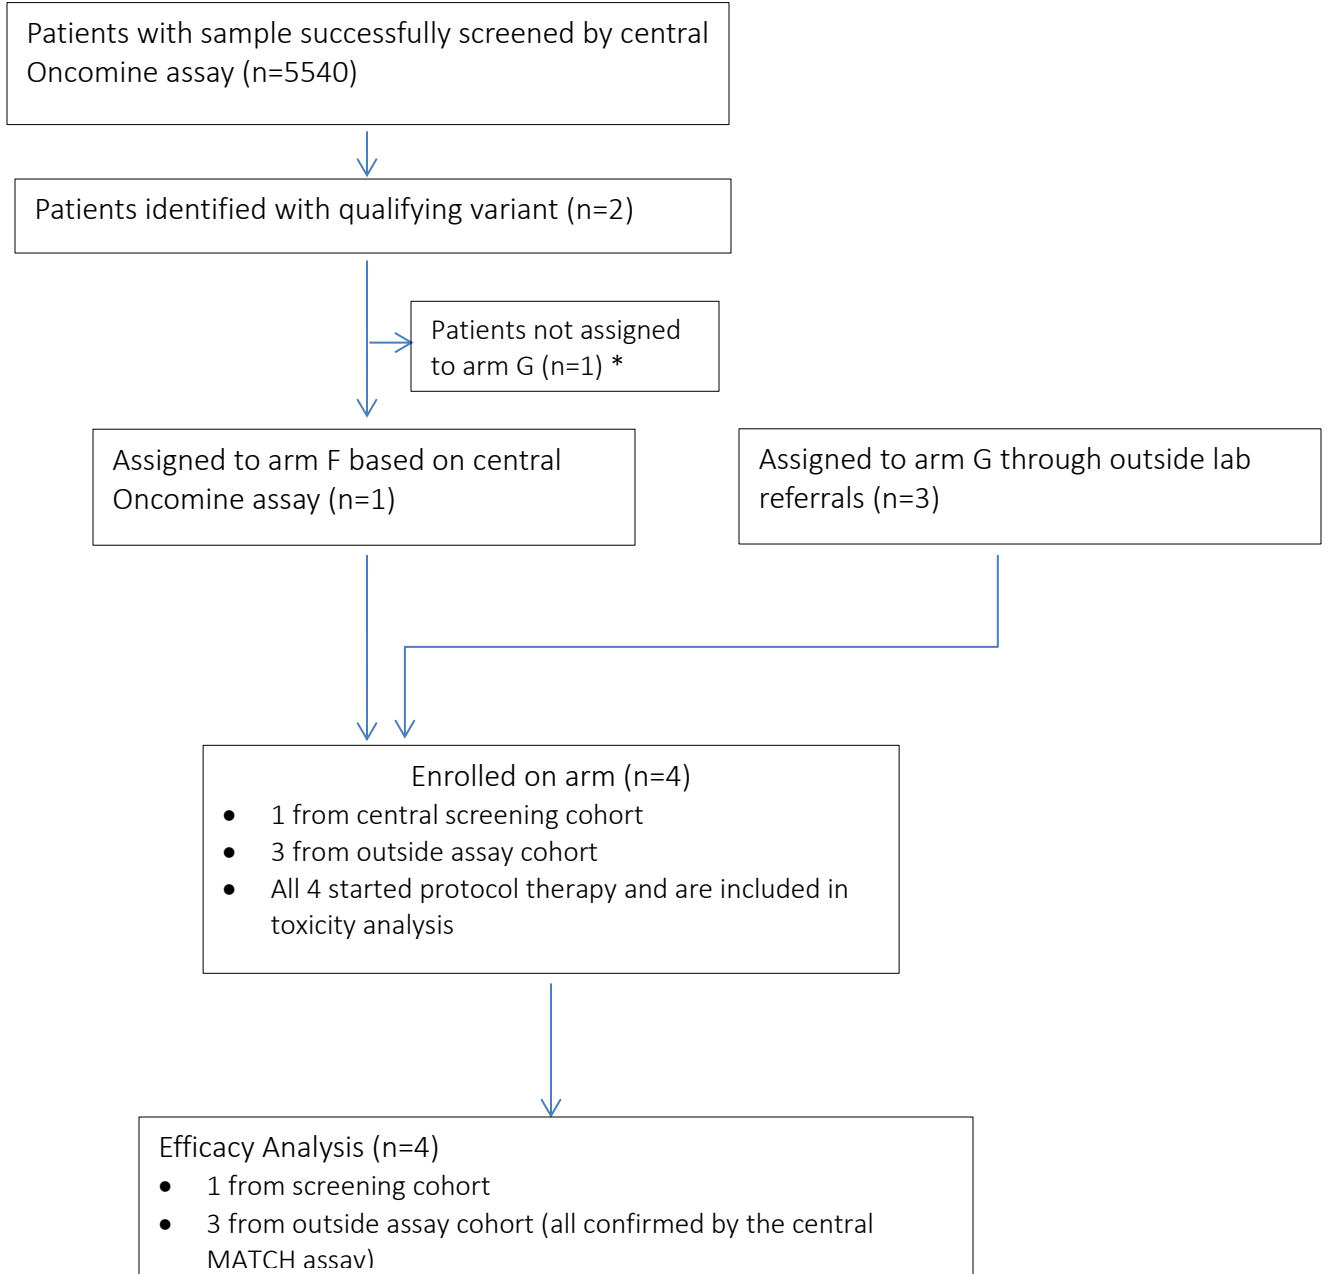

\*Reasons not receiving an assignment: Not meeting the requirements of Section 3.1 of the Match Master Protocol: Patients must have ECOG performance status  $\leq 1$  (n=1)

**Supplemental Table 1: Actionable Mutations for Sub-Protocol EAY131-F**

| Gene | Variant ID                 |
|------|----------------------------|
| ALK  | ACTG2-ALK.A2A18            |
| ALK  | C2orf44-ALK.C4A20.COSF1264 |
| ALK  | CLIP4-ALK.C11A23           |
| ALK  | EML4-ALK.E13A20.AB462411   |
| ALK  | EML4-ALK.E13A20.COSF1062   |
| ALK  | EML4-ALK.E13A20.COSF408    |
| ALK  | EML4-ALK.E14A20.COSF1064   |
| ALK  | EML4-ALK.E14A20.COSF477    |
| ALK  | EML4-ALK.E15A20.COSF413    |
| ALK  | EML4-ALK.E17A20.COSF1366   |
| ALK  | EML4-ALK.E17A20.COSF1367   |
| ALK  | EML4-ALK.E18A20.COSF487    |
| ALK  | EML4-ALK.E18A20.COSF487.1  |
| ALK  | EML4-ALK.E20A20.COSF409    |
| ALK  | EML4-ALK.E20A20.COSF730    |
| ALK  | EML4-ALK.E2A20.COSF478     |
| ALK  | EML4-ALK.E2A20.COSF479     |
| ALK  | EML4-ALK.E6A17             |
| ALK  | EML4-ALK.E6A18             |
| ALK  | EML4-ALK.E6A19.COSF1296    |
| ALK  | EML4-ALK.E6aA20.AB374361   |
| ALK  | EML4-ALK.E6aA20.COSF411    |
| ALK  | EML4-ALK.E6bA20.AB374362   |
| ALK  | EML4-ALK.E6bA20.COSF412    |
| ALK  | EML4-ALK.E7A20.NGS         |
| ALK  | GTF2IRD-ALK.G7A20          |
| ALK  | HIP1-ALK.H21A20            |
| ALK  | HIP1-ALK.H28A20            |
| ALK  | KIF5B-ALK.K15A20.COSF1060  |
| ALK  | KIF5B-ALK.K15A20.COSF1381  |
| ALK  | KIF5B-ALK.K17A20.COSF1257  |
| ALK  | KIF5B-ALK.K24A20.COSF1058  |
| ALK  | KLC1-ALK.K9A20.COSF1276    |
| ALK  | MEMO1-ALK.M2A7             |
| ALK  | NCOA1-ALK.N21A1.NGS        |
| ALK  | PRKAR1A-ALK.P2A20.NGS      |
| ALK  | PTPN3-ALK.P2A10            |
| ALK  | STRN-ALK.S3A20.COSF1430    |
| ALK  | TFG-ALK.T4A20.COSF424      |
| ALK  | TFG-ALK.T5A20.COSF426      |

|     |                         |
|-----|-------------------------|
| ALK | TFG-ALK.T6A20.COSF428   |
| ALK | TPM1-ALK.T8A20.NGS      |
| ALK | TPM3-ALK.T7A20          |
| ALK | TPM4-ALK.T6A20          |
| ALK | TPR-ALK.T15A20          |
| ALK | VCL-ALK.V16A20.COSF1057 |

**Supplemental Table 2: Actionable Mutations for Sub-Protocol EAY131-G**

| <b>Gene</b> | <b>Variant ID</b>            |
|-------------|------------------------------|
| ROS1        | CCDC6-ROS1.C5R35             |
| ROS1        | CD74-ROS1.C4R33.NGS          |
| ROS1        | CD74-ROS1.C6R32.COSF1202     |
| ROS1        | CD74-ROS1.C6R34.COSF1200     |
| ROS1        | CD74-ROS1.C6R35              |
| ROS1        | CEP85L-ROS1.C8R36            |
| ROS1        | CLIP1-ROS1.C19R36            |
| ROS1        | CLTC-ROS1.C31R35             |
| ROS1        | ERC1-ROS1.E11R36             |
| ROS1        | EZR-ROS1.E10R34.COSF1267     |
| ROS1        | EZR-ROS1.E10R35              |
| ROS1        | GOPC-ROS1.G4R36.COSF1188     |
| ROS1        | GOPC-ROS1.G8R35.COSF1139     |
| ROS1        | HLA_A-ROS1.H7R34             |
| ROS1        | KDEL2-ROS1.K5R35             |
| ROS1        | KDEL2-ROS1.K5Rintron34       |
| ROS1        | KIAA1598-ROS1.K11R36         |
| ROS1        | LRIG3-ROS1.L16R35.COSF1269   |
| ROS1        | MSN-ROS1.M9R34               |
| ROS1        | MYO5A-ROS1.M23R35            |
| ROS1        | PPFIBP1-ROS1.P9R35           |
| ROS1        | PWWP2A-ROS1.P1R36            |
| ROS1        | SDC4-ROS1.S2R32.COSF1265     |
| ROS1        | SDC4-ROS1.S2R34              |
| ROS1        | SDC4-ROS1.S4R32.COSF1278     |
| ROS1        | SDC4-ROS1.S4R34.COSF1280     |
| ROS1        | SLC34A2-ROS1.S13R32.COSF1259 |
| ROS1        | SLC34A2-ROS1.S13R34.COSF1261 |
| ROS1        | SLC34A2-ROS1.S13R36          |
| ROS1        | SLC34A2-ROS1.S4R32.COSF1197  |
| ROS1        | SLC34A2-ROS1.S4R34.COSF1198  |

|      |                          |
|------|--------------------------|
| ROS1 | TFG-ROS1.T4R35           |
| ROS1 | TPM3-ROS1.T3R36          |
| ROS1 | TPM3-ROS1.T7R35.COSF1273 |
| ROS1 | ZCCHC8-ROS1.Z2R36        |

**Supplemental Table 3: Response status and concurrent alterations**

| Arm | Histology                                                                                | Best response | Best % change | Rearrangement                                         | # cycles | PFS event | PFS Time (mos) | Concurrent Alterations                                     |
|-----|------------------------------------------------------------------------------------------|---------------|---------------|-------------------------------------------------------|----------|-----------|----------------|------------------------------------------------------------|
| F   | Carcinoma of unknown primary site                                                        | SD            | +2.4%         | EML4-ALK.E6aA20.AB3 74361 & EML4-ALK.E6bA20.AB3 74362 | 1        | 1         | 2.3            | N/A                                                        |
| F   | Mucinous adenocarcinoma of transverse colon                                              | PR            | -61.5%        | EML4-ALK.E21A20                                       | 6        | 1         | 5.3            | SMAD4 p.Arg361His<br>SMAD4 p.Arg135Ter<br>APC p.Glu1544Ter |
| F   | Leiomyosarcoma of abdominal wall arising in mitotically active leiomyoma, Müllerian type | CR            | -100%         | ACTG2-ALK.A2A18                                       | 12       | 0         | 10.8           | N/A                                                        |

|   |                                                                 |    |        |                          |   |   |     |                                                                                                         |
|---|-----------------------------------------------------------------|----|--------|--------------------------|---|---|-----|---------------------------------------------------------------------------------------------------------|
| F | Adeno-carcinoma of the rectum                                   | PD | -3.1%  | STRN-ALK.S3A20.COSF1430  | 2 | 1 | 1.7 | APC p.Arg876Ter<br>TP53 p.Arg282Trp<br>BRAF-BRAF fusion                                                 |
| G | Intrahepatic cholangiocarcinoma                                 | PD | N/A*   | GOPC-ROS1.G8R35.COSF1139 | 1 | 1 | 0.5 | SMAD4 p.Glu330Lys                                                                                       |
| G | Adeno-carcinoma of head of pancreas                             | PD | +5.1%  | GOPC-ROS1.G8R35.COSF1139 | 2 | 1 | 1.6 | BRCA2 p.Thr3033fs*11<br>BRCA2 pAla938fs*21<br>FBXW7 p.splice site 584+2T>G                              |
| G | Low-grade serous adeno-carcinoma of ovary with mucin production | PR | -54.2% | GOPC-ROS1.G4R36.COSF1188 | 6 | 0 | 5.5 | NA                                                                                                      |
| G | Adeno-carcinoma of ascending colon                              | SD | -13%   | GOPC-ROS1.G8R35.COSF1139 | 8 | 1 | 6.9 | APC p.Leu548fsTer11<br>APC p.Gln1406Ter<br>SMAD4 p.Tyr117fsTer1<br>SMAD4 p.Tyr117Ter<br>TP53 p.Ser94Ter |



**Supplemental Table 4: Toxicities at least possibly related to treatment**

| Toxicity Type                                                         | Treatment Arm  |          |          |          |                |          |          |          |             |          |          |          |
|-----------------------------------------------------------------------|----------------|----------|----------|----------|----------------|----------|----------|----------|-------------|----------|----------|----------|
|                                                                       | EAY131-F (n=5) |          |          |          | EAY131-G (n=4) |          |          |          | Total (n=9) |          |          |          |
|                                                                       | Grade          |          |          |          | Grade          |          |          |          | Grade       |          |          |          |
|                                                                       | 1,2<br>(n)     | 3<br>(n) | 4<br>(n) | 5<br>(n) | 1,2<br>(n)     | 3<br>(n) | 4<br>(n) | 5<br>(n) | 1,2<br>(n)  | 3<br>(n) | 4<br>(n) | 5<br>(n) |
| Anemia                                                                | 1              | -        | -        | -        | 1              | -        | -        | -        | 2           | -        | -        | -        |
| Sinus bradycardia                                                     | 2              | -        | -        | -        | -              | -        | -        | -        | 2           | -        | -        | -        |
| Dry eye                                                               | -              | -        | -        | -        | 1              | -        | -        | -        | 1           | -        | -        | -        |
| Eye disorders - Other, specify                                        | 1              | -        | -        | -        | -              | -        | -        | -        | 1           | -        | -        | -        |
| Flashing lights                                                       | 1              | -        | -        | -        | -              | -        | -        | -        | 1           | -        | -        | -        |
| Photophobia                                                           | 1              | -        | -        | -        | -              | -        | -        | -        | 1           | -        | -        | -        |
| Abdominal distension                                                  | 1              | -        | -        | -        | -              | -        | -        | -        | 1           | -        | -        | -        |
| Abdominal pain                                                        | 1              | -        | -        | -        | -              | 1        | -        | -        | 1           | 1        | -        | -        |
| Bloating                                                              | -              | -        | -        | -        | 1              | -        | -        | -        | 1           | -        | -        | -        |
| Constipation                                                          | 1              | -        | -        | -        | 1              | -        | -        | -        | 2           | -        | -        | -        |
| Diarrhea                                                              | 3              | -        | -        | -        | 1              | -        | -        | -        | 4           | -        | -        | -        |
| Dyspepsia                                                             | -              | -        | -        | -        | 1              | -        | -        | -        | 1           | -        | -        | -        |
| Gastrointestinal disorders - Other, specify                           | 1              | -        | -        | -        | -              | -        | -        | -        | 1           | -        | -        | -        |
| Hemorrhoids                                                           | -              | -        | -        | -        | 1              | -        | -        | -        | 1           | -        | -        | -        |
| Nausea                                                                | 3              | -        | -        | -        | 1              | -        | -        | -        | 4           | -        | -        | -        |
| Vomiting                                                              | 1              | -        | -        | -        | 1              | -        | -        | -        | 2           | -        | -        | -        |
| Fatigue                                                               | 2              | -        | -        | -        | 2              | -        | -        | -        | 4           | -        | -        | -        |
| Fever                                                                 | -              | -        | -        | -        | 1              | -        | -        | -        | 1           | -        | -        | -        |
| General disorders and administration site conditions - Other, specify | 1              | -        | -        | -        | -              | -        | -        | -        | 1           | -        | -        | -        |
| Edema limbs                                                           | 1              | -        | -        | -        | 1              | -        | -        | -        | 2           | -        | -        | -        |
| Alanine aminotransferase increased                                    | 3              | -        | 1        | -        | 1              | -        | -        | -        | 4           | -        | 1        | -        |
| Alkaline phosphatase increased                                        | 3              | -        | -        | -        | 1              | -        | -        | -        | 4           | -        | -        | -        |
| Aspartate aminotransferase increased                                  | 2              | 1        | 1        | -        | 1              | -        | -        | -        | 3           | 1        | 1        | -        |
| Blood bilirubin increased                                             | 1              | -        | 1        | -        | -              | -        | -        | -        | 1           | -        | 1        | -        |

| Toxicity Type                   | Treatment Arm  |          |          |          |                |          |          |          |             |          |          |          |
|---------------------------------|----------------|----------|----------|----------|----------------|----------|----------|----------|-------------|----------|----------|----------|
|                                 | EAY131-F (n=5) |          |          |          | EAY131-G (n=4) |          |          |          | Total (n=9) |          |          |          |
|                                 | Grade          |          |          |          | Grade          |          |          |          | Grade       |          |          |          |
|                                 | 1,2<br>(n)     | 3<br>(n) | 4<br>(n) | 5<br>(n) | 1,2<br>(n)     | 3<br>(n) | 4<br>(n) | 5<br>(n) | 1,2<br>(n)  | 3<br>(n) | 4<br>(n) | 5<br>(n) |
| Creatinine increased            | -              | -        | -        | -        | 1              | -        | -        | -        | 1           | -        | -        | -        |
| Investigations - Other, specify | 1              | -        | -        | -        | -              | -        | -        | -        | 1           | -        | -        | -        |
| Lymphocyte count decreased      | 2              | -        | -        | -        | -              | 1        | -        | -        | 2           | 1        | -        | -        |
| Platelet count decreased        | -              | -        | -        | -        | 1              | -        | -        | -        | 1           | -        | -        | -        |
| Weight gain                     | -              | -        | -        | -        | 1              | -        | -        | -        | 1           | -        | -        | -        |
| Weight loss                     | -              | -        | -        | -        | 1              | -        | -        | -        | 1           | -        | -        | -        |
| White blood cell decreased      | 1              | -        | -        | -        | 2              | -        | -        | -        | 3           | -        | -        | -        |
| Anorexia                        | 1              | -        | -        | -        | 1              | -        | -        | -        | 2           | -        | -        | -        |
| Hyperglycemia                   | 1              | -        | -        | -        | -              | -        | -        | -        | 1           | -        | -        | -        |
| Hyperkalemia                    | -              | -        | -        | -        | 1              | -        | -        | -        | 1           | -        | -        | -        |
| Hypoalbuminemia                 | 2              | -        | -        | -        | 2              | -        | -        | -        | 4           | -        | -        | -        |
| Hypocalcemia                    | 2              | -        | -        | -        | 1              | -        | -        | -        | 3           | -        | -        | -        |
| Hypoglycemia                    | 1              | -        | -        | -        | -              | -        | -        | -        | 1           | -        | -        | -        |
| Hypokalemia                     | -              | -        | -        | -        | 1              | -        | -        | -        | 1           | -        | -        | -        |
| Hypomagnesemia                  | -              | -        | -        | -        | 2              | -        | -        | -        | 2           | -        | -        | -        |
| Hyponatremia                    | -              | -        | 1        | -        | 1              | -        | -        | -        | 1           | -        | 1        | -        |
| Hypophosphatemia                | -              | 1        | -        | -        | -              | -        | -        | -        | -           | 1        | -        | -        |
| Dysgeusia                       | 1              | -        | -        | -        | -              | -        | -        | -        | 1           | -        | -        | -        |
| Headache                        | 1              | -        | -        | -        | 1              | -        | -        | -        | 2           | -        | -        | -        |
| Acute kidney injury             | -              | -        | -        | -        | -              | 1        | -        | -        | -           | 1        | -        | -        |
| Nasal congestion                | 1              | -        | -        | -        | -              | -        | -        | -        | 1           | -        | -        | -        |
| Rash acneiform                  | 1              | -        | -        | -        | -              | -        | -        | -        | 1           | -        | -        | -        |
| Rash maculo-papular             | -              | -        | -        | -        | 1              | -        | -        | -        | 1           | -        | -        | -        |
| Hypertension                    | -              | -        | -        | -        | 1              | -        | -        | -        | 1           | -        | -        | -        |
| <b>WORST DEGREE</b>             | 3              | 1        | 1        | -        | 2              | 2        | -        | -        | 5           | 3        | 1        | -        |

**Supplemental Table 5:****Frequencies of ALK and ROS1 rearrangements (excluding NSCLC and lymphoma)**

|                                              | <b>ALK</b>           | <b>ROS1</b>          |
|----------------------------------------------|----------------------|----------------------|
| Vendor 1                                     | 1.3x10 <sup>-3</sup> | 5.6x10 <sup>-4</sup> |
| Vendor 2                                     | 7.4x10 <sup>-4</sup> | 1.6x10 <sup>-4</sup> |
| Vendor 3                                     | 6.0x10 <sup>-4</sup> | 2.0x10 <sup>-4</sup> |
| <b>Combined frequencies from two vendors</b> |                      |                      |
|                                              | 1.0x10 <sup>-3</sup> | 4.0x10 <sup>-4</sup> |

**Supplemental Table 6:****Expanded cohort of ALK-rearrangements (excluding NSCLC and lymphoma)**

| <b>Malignancy</b>                     | <b># cases</b> | <b>Proportion of all ALK cases</b> |
|---------------------------------------|----------------|------------------------------------|
| Thyroid Carcinoma                     | 6              | 0.162162                           |
| Colorectal Adenocarcinoma             | 5              | 0.135135                           |
| Soft Tissue Tumor                     | 5              | 0.135135                           |
| Pancreatic Adenocarcinoma             | 4              | 0.108108                           |
| Cancer of Unknown Primary             | 3              | 0.081081                           |
| Female Genital Tract Malignancy       | 3              | 0.081081                           |
| Ovarian Surface Epithelial Carcinoma  | 2              | 0.054054                           |
| Uterine Serous Carcinoma              | 2              | 0.054054                           |
| Bladder Cancer - Urothelial           | 1              | 0.027027                           |
| Gastrointestinal Stromal Tumor (GIST) | 1              | 0.027027                           |
| Kidney Cancer                         | 1              | 0.027027                           |
| Lung Small Cell Cancer (SCLC)         | 1              | 0.027027                           |
| Melanoma                              | 1              | 0.027027                           |
| Retroperitoneal or Peritoneal Sarcoma | 1              | 0.027027                           |
| Salivary Gland Tumors                 | 1              | 0.027027                           |

**Supplemental Table 7:****Expanded cohort of ROS1-rearrangements (excluding NSCLC and lymphoma)**

| <b>Malignancy</b>         | <b># cases</b> | <b>Proportion of all ROS1 cases</b> |
|---------------------------|----------------|-------------------------------------|
| Glioblastoma              | 8              | 0.5                                 |
| Breast Carcinoma          | 2              | 0.125                               |
| Cancer of Unknown Primary | 1              | 0.0625                              |
| Cholangiocarcinoma        | 1              | 0.0625                              |
| Colorectal Adenocarcinoma | 1              | 0.0625                              |
| Pancreatic Adenocarcinoma | 1              | 0.0625                              |
| Soft Tissue Tumor         | 1              | 0.0625                              |
| Thyroid Carcinoma         | 1              | 0.0625                              |

**Supplemental Table 8: TMB of expanded molecular cohort**

| <b>TMB</b>    | <b># cases</b> | <b>Proportion</b> |
|---------------|----------------|-------------------|
| Intermediate  | 26             | 0.490566          |
| Low           | 22             | 0.415094          |
| High          | 2              | 0.037736          |
| QNS           | 2              | 0.037736          |
| Indeterminate | 1              | 0.018868          |

QNS: quantity not sufficient

**Supplemental Table 9: MSI of expanded molecular cohort**

| <b>MSI</b>    | <b># cases</b> | <b>Proportion</b> |
|---------------|----------------|-------------------|
| Stable        | 49             | 0.924528          |
| QNS           | 2              | 0.037736          |
| High          | 1              | 0.018868          |
| Indeterminate | 1              | 0.018868          |

QNS: quantity not sufficient
